# Supplementary material
Source: publisher figshare collection journal article supplement (https://asha.figshare.com/ndownloader/files/31475390)
Supplement: Supplementary file 1 [file 31475390]

## **Key for Supplemental Material S2.**

Acoustic Files for unilateral vocal fold paralysis:

Praat: Version 6.1.40

PowerCepstrogram (60-Hz pitch floor, 2-ms time step, 5-kHz maximum frequency, and pre-emphasis from 50 Hz). CPPS was calculated from each PowerCepstrogram with the following settings: subtract tilt before smoothing = “no”; time averaging window = 0.01 s; quefrency averaging window = 0.001 s; peak search pitch range = 60–330 Hz; tolerance = 0.05; interpolation = “Parabolic”; tilt line quefrency range = 0.001–0 s (no upper bound); line type = “Straight”; fit method = “Robust.” These settings are those used by Watts et al. (2017) and Brockmann-Bauser et al. (2019), Murton et al. (2020).

### **Sustained /a/:**

Fundamental frequency: 199.89 Hz

Cepstral Peak Prominence vowel: 10.34 dB

### **CAPE-V sentences:**

Fundamental frequency: 236.27 Hz

Cepstral Peak Prominence speech: 7.76 dB

Per Murton et al. (2020) CPP values below the following thresholds indicated the presence of a voice disorder with up to 94.5% accuracy.

< 14.45 dB (Praat) for the sustained /a/ vowels and

< 9.33 dB (Praat) for the Rainbow Passage/connected speech
